# Supplementary material
Source: bioRxiv or medRxiv preprint supplement (https://www.biorxiv.org/highwire/filestream/2378/field_highwire_adjunct_files/0/009373-1.pdf)
Supplement: Supplementary file [file 009373-1.pdf]

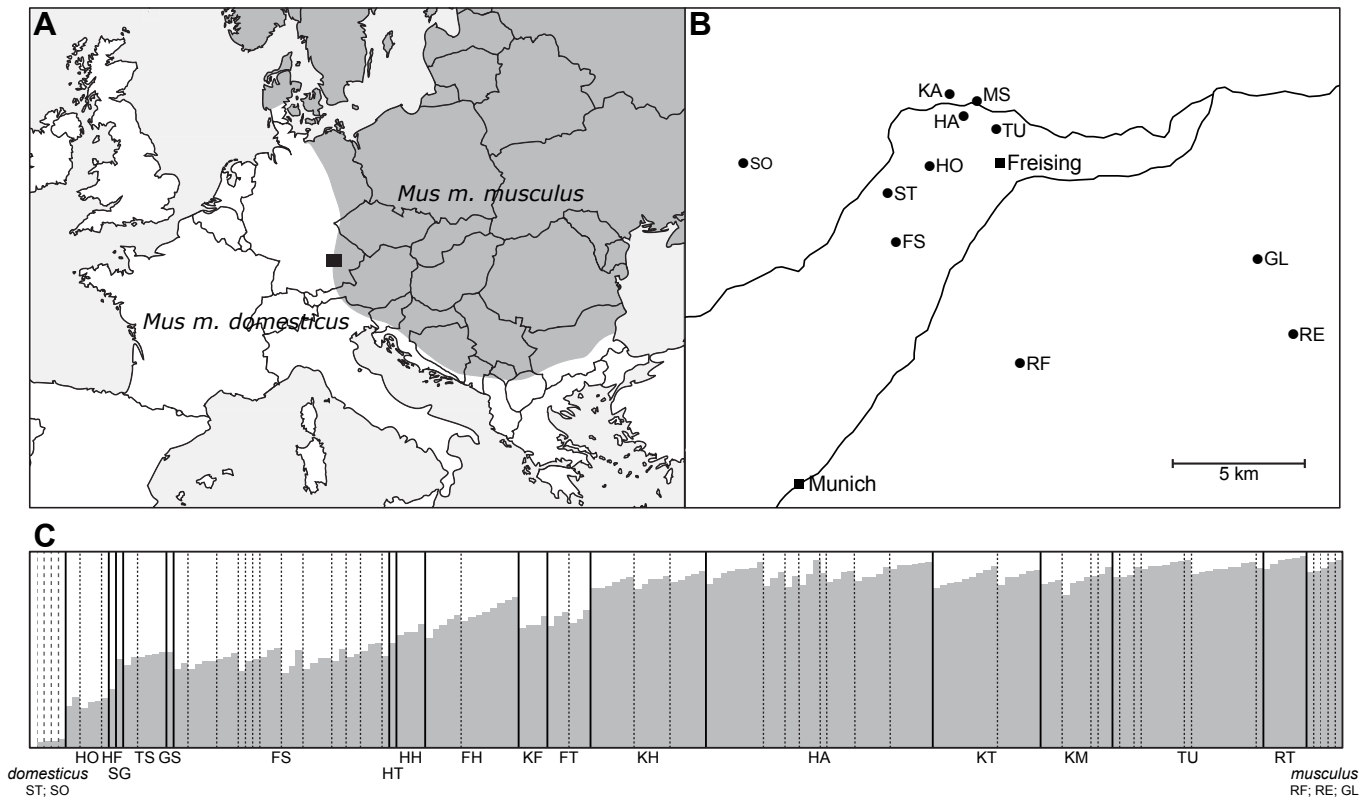

**Figure 1 - figure supplement 1**

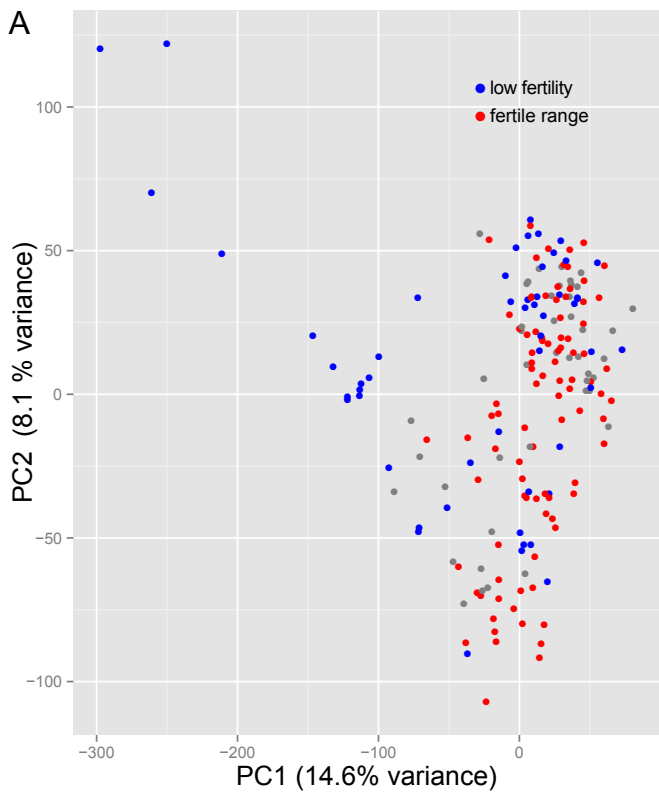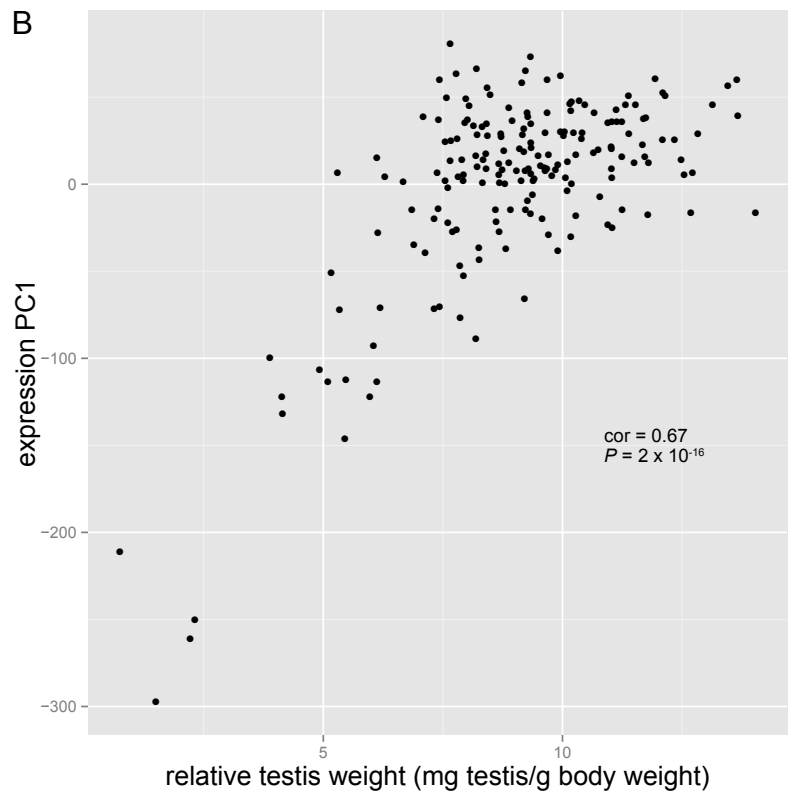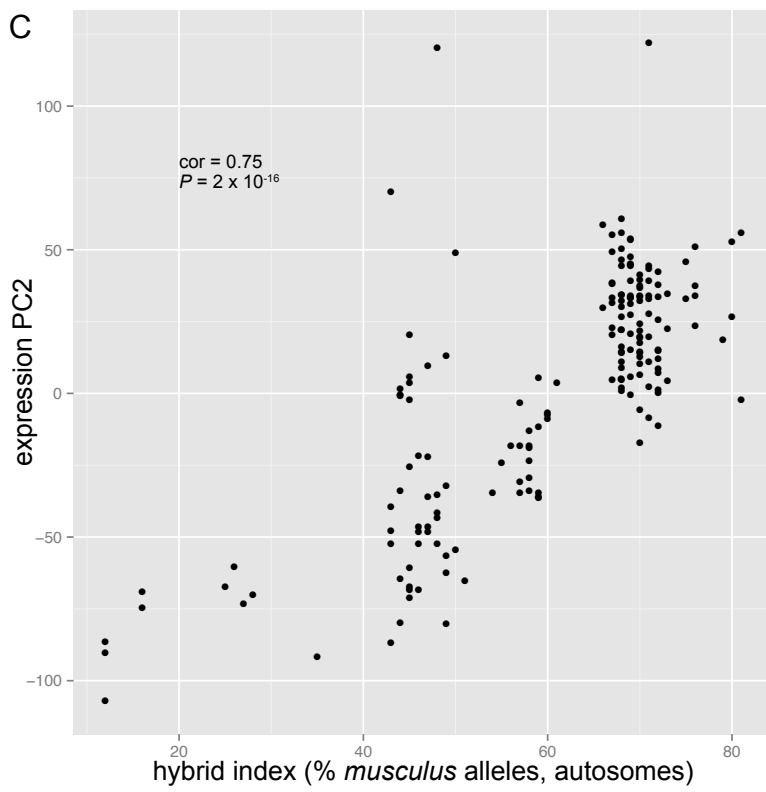

**Figure 1 - figure supplement 2**

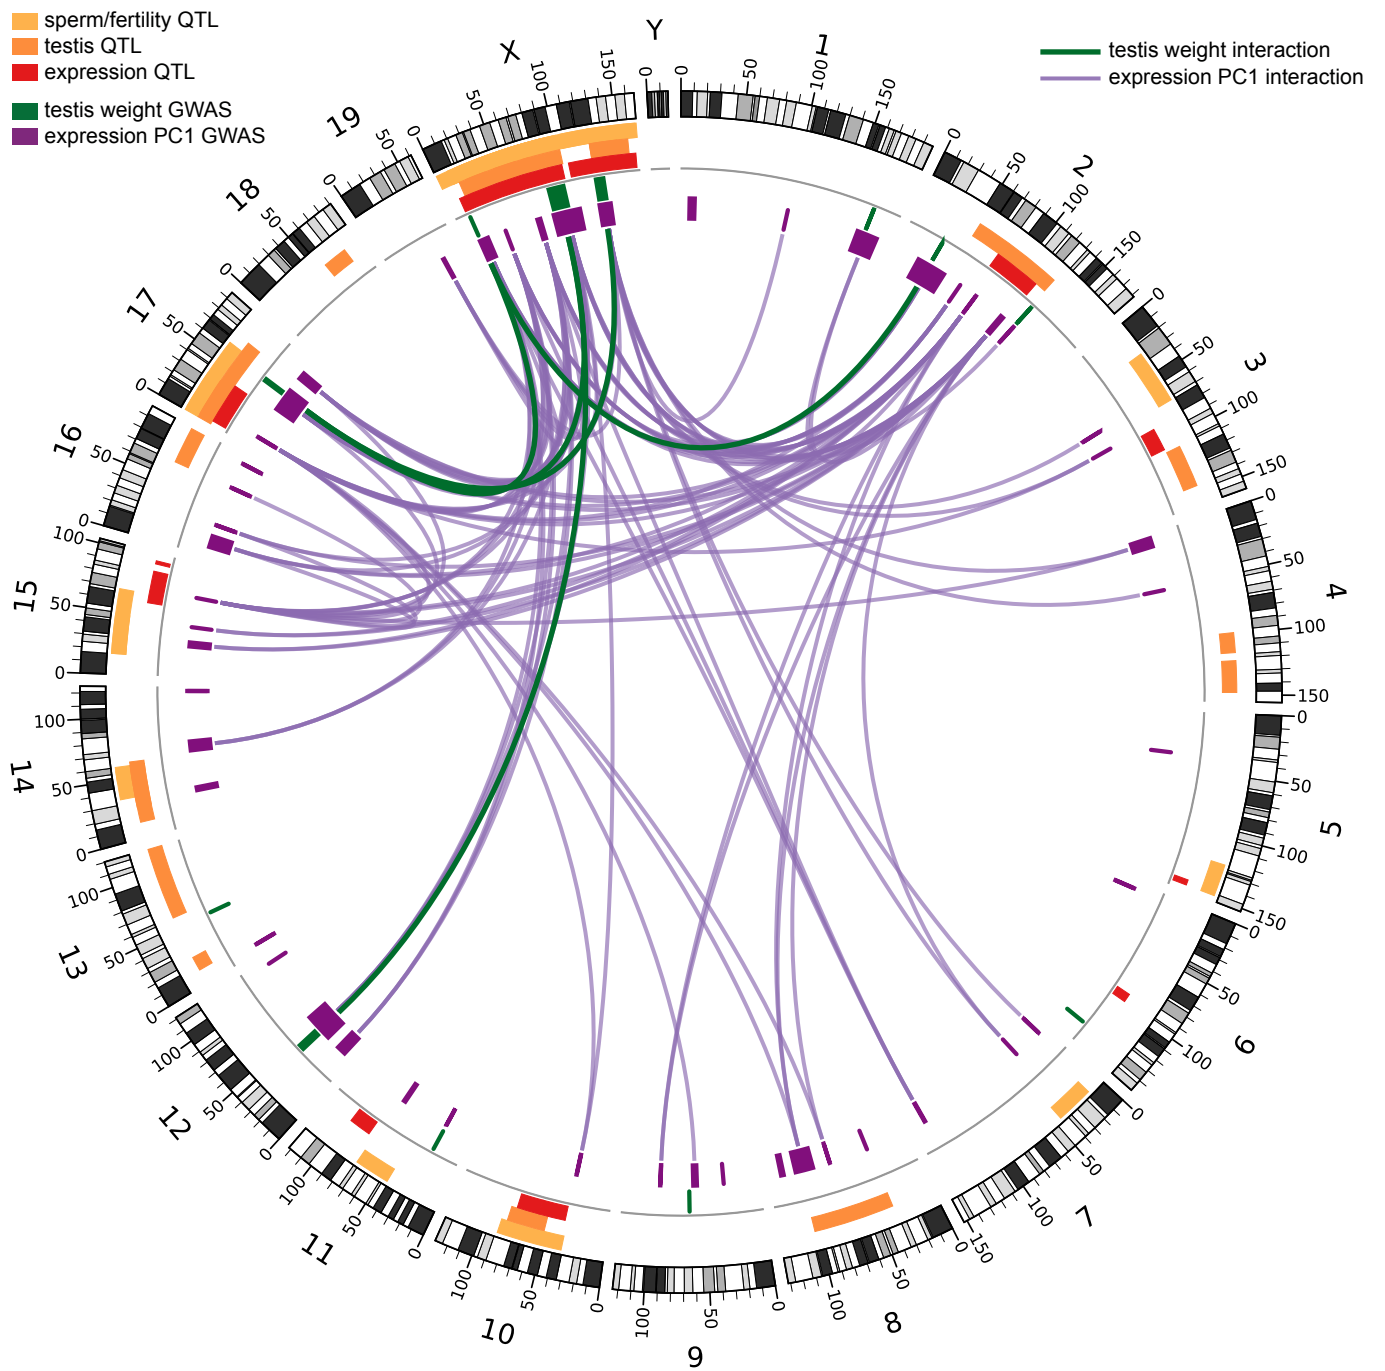

Figure 2 - figure supplement 1

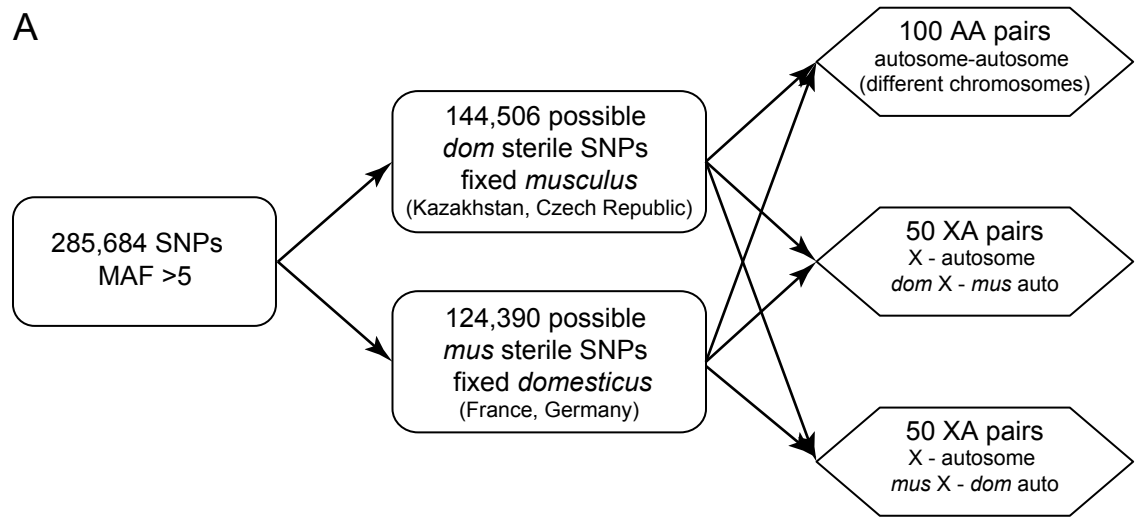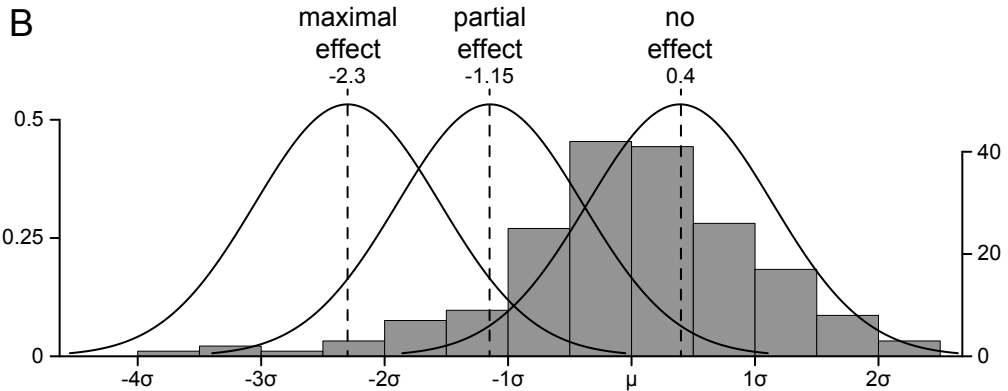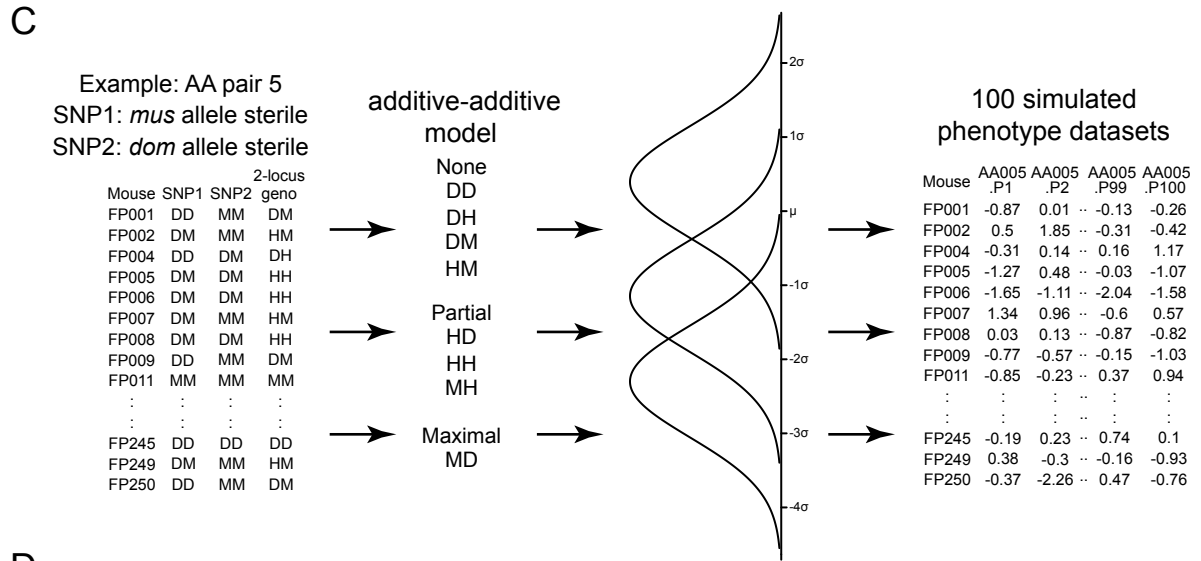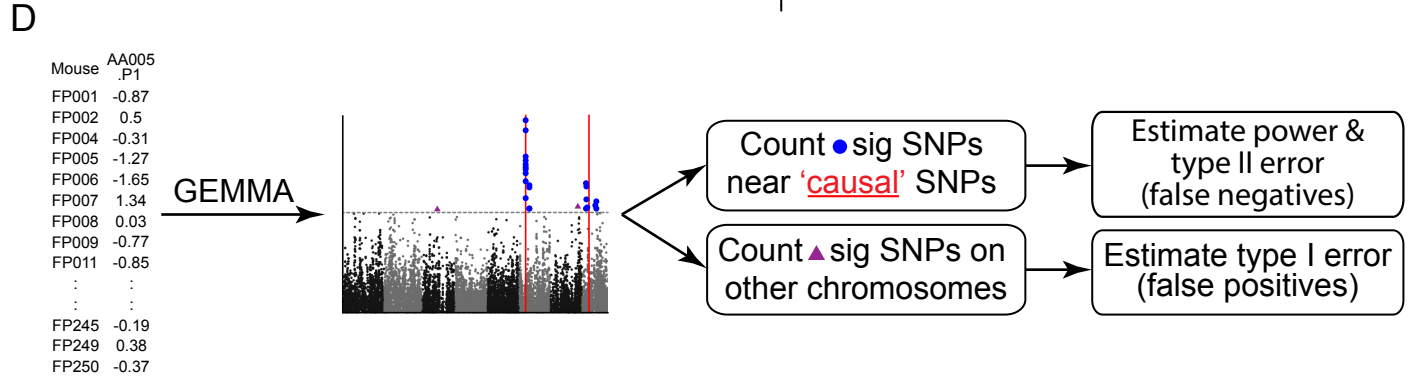

Figure 4 - figure supplement 1

Figure 4 – figure supplement 2.

**Z scores for simulation models.**

|                                 | Locus 1 dominance <sup>1</sup> | Locus 1 sterile allele | Locus 2 dominance <sup>1</sup> | Locus 2 sterile allele | Mean Z score |       |       |       |       |       |       |      |       |
|---------------------------------|--------------------------------|------------------------|--------------------------------|------------------------|--------------|-------|-------|-------|-------|-------|-------|------|-------|
|                                 |                                |                        |                                |                        | DD           | HD    | MD    | DH    | HH    | MH    | DM    | HM   | MM    |
| <b>autosomal-<br/>autosomal</b> | rec                            | M                      | rec                            | D                      | 0.4          | -0.03 | -2.3  | -0.44 | 0.44  | 0.23  | -0.47 | 0.42 | -0.08 |
|                                 | rec                            | M                      | add                            | D                      | 0.4          | -0.03 | -2.3  | -0.44 | 0.44  | -1.15 | -0.47 | 0.42 | -0.08 |
|                                 | rec                            | M                      | dom                            | D                      | 0.4          | -0.03 | -2.3  | -0.44 | 0.44  | -2.3  | -0.47 | 0.42 | -0.08 |
|                                 | add                            | M                      | add                            | D                      | 0.4          | -1.15 | -2.3  | -0.44 | -1.15 | -1.15 | -0.47 | 0.42 | -0.08 |
|                                 | add                            | M                      | dom                            | D                      | 0.4          | -1.15 | -2.3  | -0.44 | -1.15 | -2.3  | -0.47 | 0.42 | -0.08 |
|                                 | dom                            | M                      | dom                            | D                      | 0.4          | -2.3  | -2.3  | -0.44 | -2.3  | -2.3  | -0.47 | 0.42 | -0.08 |
| <b>X-<br/>autosomal</b>         | X                              | M                      | rec                            | D                      | 0.4          | -     | -2.3  | -0.3  | -     | 0.3   | -0.33 | -    | 0     |
|                                 | X                              | M                      | add                            | D                      | 0.4          | -     | -2.3  | -0.3  | -     | -1.15 | -0.33 | -    | 0     |
|                                 | X                              | M                      | dom                            | D                      | 0.4          | -     | -2.3  | -0.3  | -     | -2.3  | -0.33 | -    | 0     |
|                                 | X                              | D                      | rec                            | M                      | 0            | -     | -0.33 | 0.3   | -     | -0.3  | -2.3  | -    | 0.4   |
|                                 | X                              | D                      | add                            | M                      | 0            | -     | 0.27  | -1.15 | -     | -0.3  | -2.3  | -    | 0.4   |
|                                 | X                              | D                      | dom                            | M                      | 0            | -     | -0.33 | -2.3  | -     | -0.3  | -2.3  | -    | 0.4   |

<sup>1</sup>add – additive; dom – dominant; rec – recessive

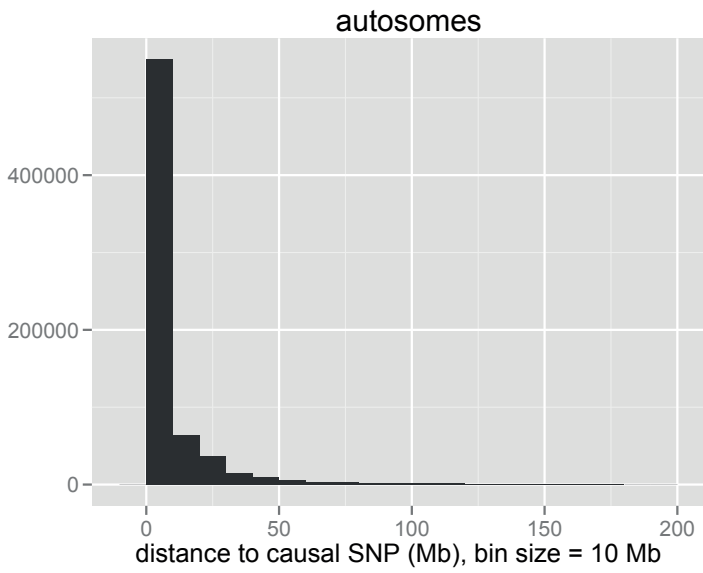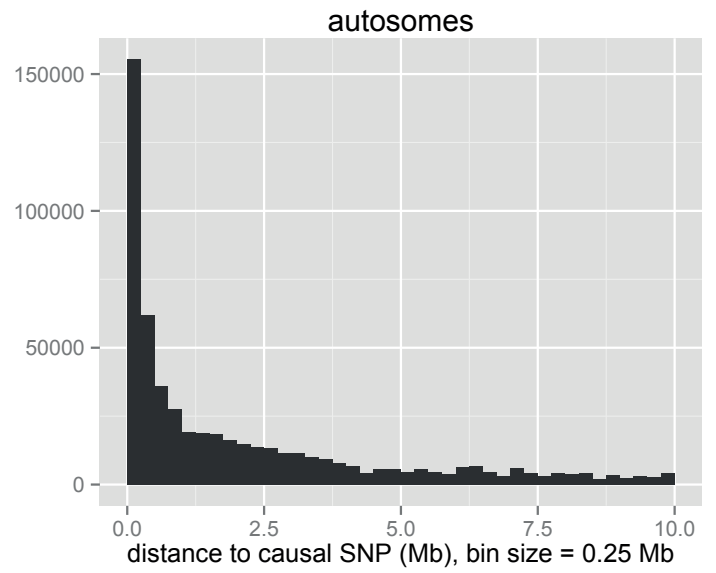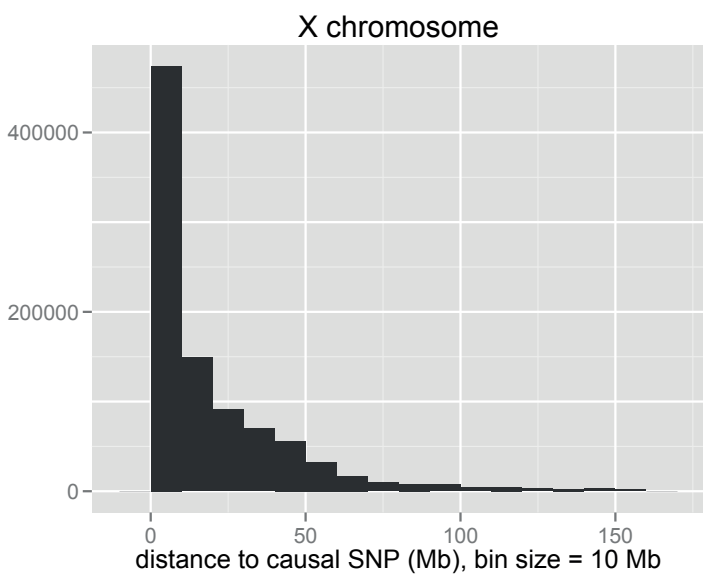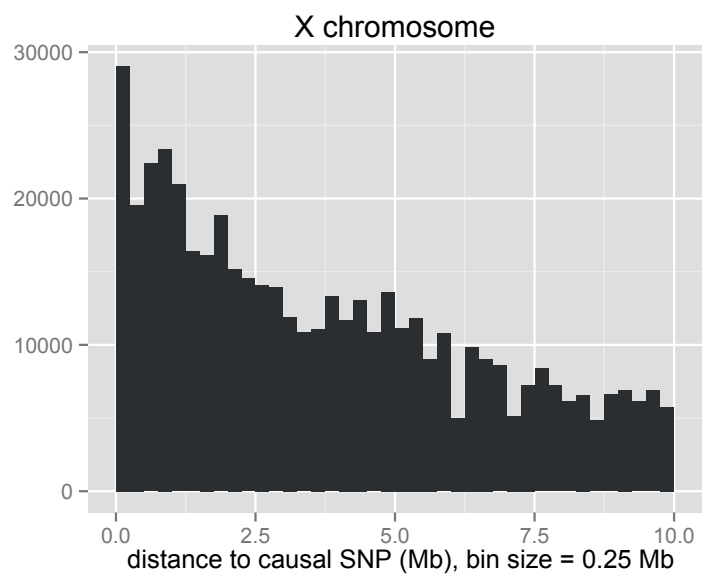

**Figure 4 - figure supplement 3**

Figure 4 – figure supplement 4.

Results of mapping simulations.

| Architecture <sup>1</sup>                   | Med. Distance to Causal SNP (Mb) X chromosome/Autosome | Locus 1 detected <sup>2,3</sup> |      |       | Locus 2 detected <sup>3,4</sup> |      |       | Both loci detected <sup>3</sup> |      |       | Mean No. Sig. SNPs |                    |                         |
|---------------------------------------------|--------------------------------------------------------|---------------------------------|------|-------|---------------------------------|------|-------|---------------------------------|------|-------|--------------------|--------------------|-------------------------|
|                                             |                                                        | 0.2 Mb                          | 1 Mb | 10 Mb | 0.2 Mb                          | 1 Mb | 10 Mb | 0.2 Mb                          | 1 Mb | 10 Mb | 10 Mb <sup>5</sup> | 50 Mb <sup>5</sup> | Diff. Chr. <sup>6</sup> |
| <b>Permutation <math>P &lt; 0.05</math></b> |                                                        |                                 |      |       |                                 |      |       |                                 |      |       |                    |                    |                         |
| rec-rec                                     | 5.9                                                    | 7.2                             | 8.4  | 12.3  | 9.0                             | 11.7 | 15.8  | 0.3                             | 0.7  | 2.6   | 1.1                | 1.5                | 5.5                     |
| rec-add                                     | 2.6                                                    | 18.3                            | 22.2 | 28.0  | 12.6                            | 15.8 | 21.0  | 3.2                             | 4.4  | 7.2   | 3.5                | 2.3                | 4.4                     |
| rec-dom                                     | 2.0                                                    | 27.4                            | 31.8 | 39.2  | 19.1                            | 22.2 | 26.4  | 5.5                             | 7.8  | 12.9  | 6.9                | 8.5                | 5.0                     |
| add-add                                     | 1.4                                                    | 6.7                             | 7.7  | 10.5  | 47.5                            | 51.9 | 55.8  | 2.7                             | 3.1  | 4.7   | 7.9                | 9.2                | 6.1                     |
| add-dom                                     | 1.7                                                    | 14.2                            | 15.9 | 19.0  | 51.6                            | 55.7 | 59.2  | 6.0                             | 7.5  | 10.3  | 11.1               | 13.3               | 5.4                     |
| dom-dom                                     | 1.8                                                    | 7.8                             | 9.8  | 14.3  | 63.8                            | 66.9 | 70.6  | 2.4                             | 3.7  | 7.3   | 14.7               | 17.6               | 6.2                     |
| X-rec                                       | 12.2/4.8                                               | 10.3                            | 14.0 | 26.2  | 10.0                            | 12.7 | 18.8  | 0.1                             | 1.3  | 4.9   | 5.6                | 9.9                | 4.8                     |
| X-add                                       | 9.1/2.0                                                | 33.9                            | 39.1 | 48.5  | 24.3                            | 25.6 | 31.0  | 3.8                             | 5.3  | 11.4  | 21.9               | 35.7               | 5.7                     |
| X-dom                                       | 9.8/2.0                                                | 46.5                            | 51.3 | 59.7  | 26.9                            | 28.5 | 32.6  | 5.9                             | 8.6  | 14.4  | 31.0               | 52.8               | 3.8                     |
| <b>FDR &lt; 0.1</b>                         |                                                        |                                 |      |       |                                 |      |       |                                 |      |       |                    |                    |                         |
| rec-rec                                     | 10.0                                                   | 16.6                            | 21.4 | 34.7  | 18.5                            | 23.5 | 35.5  | 3.5                             | 5.4  | 15.0  | 5.1                | 8.3                | 34.7                    |
| rec-add                                     | 5.5                                                    | 32.7                            | 39.7 | 52.7  | 27.2                            | 32.6 | 45.2  | 11.4                            | 15.5 | 27.9  | 13.2               | 18.9               | 32.9                    |
| rec-dom                                     | 4.1                                                    | 42.2                            | 49.7 | 62.9  | 33.5                            | 37.2 | 48.4  | 16.5                            | 21.3 | 33.8  | 22.2               | 30.1               | 28.7                    |
| add-add                                     | 3.6                                                    | 14.4                            | 17.6 | 30.6  | 63.3                            | 69.3 | 77.6  | 8.4                             | 11.3 | 23.3  | 21.6               | 28.8               | 36.8                    |
| add-dom                                     | 3.5                                                    | 26.5                            | 31.1 | 42.0  | 65.5                            | 70.6 | 78.1  | 18.2                            | 22.8 | 33.5  | 29.2               | 39.3               | 29.1                    |
| dom-dom                                     | 3.6                                                    | 16.4                            | 22.1 | 35.3  | 76.8                            | 79.8 | 85.9  | 9.4                             | 15.1 | 29.3  | 35.5               | 48.0               | 26.5                    |
| X-rec                                       | 12.2/7.8                                               | 10.3                            | 14.0 | 26.2  | 20.0                            | 25.2 | 40.5  | 0.7                             | 3.1  | 11.0  | 10.3               | 17.5               | 34.6                    |
| X-add                                       | 9.1/4.7                                                | 33.9                            | 39.1 | 48.5  | 33.2                            | 36.6 | 48.3  | 6.3                             | 9.4  | 20.9  | 28.7               | 46.1               | 30.0                    |
| X-dom                                       | 9.8/5.0                                                | 46.5                            | 51.3 | 59.7  | 37.0                            | 41.2 | 50.9  | 11.4                            | 16.3 | 27.2  | 38.8               | 65.5               | 21.6                    |

<sup>1</sup>Architecture abbreviations: add – additive; dom – dominant; rec – recessive

<sup>2</sup>Locus 1 for autosomal pairs is *musculus* sterile allele; locus 1 for X-autosomal pairs is X-linked

<sup>3</sup>'detected' -  $\geq 1$  significant SNP within given distance criterion

<sup>4</sup>Locus 2 for autosomal pairs has a *domesticus* sterile allele; locus 2 for X-autosomal pairs is autosomal

<sup>5</sup>Mean number significant SNPs within distance criterion for either locus

<sup>6</sup>Mean number significant SNPs on chromosomes not containing 'causal' SNPs
